# Supplementary material
Source: PubMed Central journal article supplement (PMC5812933)
Supplement: AEM.02528-17_zam005188356s1.pdf [file AEM.02528-17_zam005188356s1.pdf]

## SUPPORTING INFORMATION RESULTS

### Content.

#### Tables

Supporting Information Table 1. NMR Chemical Shifts for salivaricin A2.

Supporting Information Table 2: NMR Chemical Shifts for salivaricin A2(3-22).

Supporting Information Table 3. Protease stability of salivaricin A2.

#### Figures

Supporting Information Figure 1. HPLC purification of salivaricin A2.

Supporting Information Figure 2. TOCSY salivaricin A2.

Supporting Information Figure 3. NOESY salivaricin A2.

Supporting Information Figure 4. TOCSY salivaricin A2(3-22).

Supporting Information Figure 5. NOESY salivaricin A2(3-22).

Supporting Information Figure 6. Masses of salivaricin A2 and control peptide SFNSYTC before and after cyanylation by CDAP.

Supporting Information Figure 7. HPLC chromatograms of reactions from HOAt/EDC couplings of salivaricin A2(3-22) and amines.

Supporting Information Figure 8. ESI-MS data of novel analogues of salivaricin A2.

Supporting Information Figure 9. Plates for overlays of novel analogues of salivaricin A2.

Supporting Information Figure 10. TLC plate assay.

Supporting Information Figure 11. 16S rRNA alignment of *S. salivarius* HS0302.

**Suppl. Table 1.** Proton Chemical Shift Values for Salivaricin A2

| <b>Amino Acid</b> | <b>NH</b> | <b>H<math>\alpha</math></b> | <b>H<math>\beta</math></b> | <b>Side Chain</b>                                                                               |
|-------------------|-----------|-----------------------------|----------------------------|-------------------------------------------------------------------------------------------------|
| Lys1              | 8.09      | 3.80                        | 1.72                       | H $\gamma$ 1.30, H $\delta$ 1.52, H $\epsilon$ 2.75, H $\zeta$ 7.63                             |
| Arg2              | 8.59      | 4.39                        | 1.72                       | H $\gamma$ 2 1.58, H $\gamma$ 3 1.66,<br>H $\delta$ , 3.13, H $\epsilon$ 7.49 HH 6.82           |
| Gly3              | 8.31      | 3.84                        |                            |                                                                                                 |
| Thr4              | 7.85      | 4.24                        | 3.99                       | H $\gamma$ 1 4.94, H $\gamma$ 2 1.02                                                            |
| Gly5              | 7.97      | 3.66, 3.74                  |                            |                                                                                                 |
| Trp6              | 8.01      | 4.47                        | 2.82, 3.02                 | H $\delta$ 1 7.05, H $\epsilon$ 1 10.75, H $\epsilon$ 3 7.54, H $\zeta$ 2 7.34 H $\zeta$ 3 6.63 |
| Phe7              | 8.09      | 3.97                        | 3.05,2.77                  | H $\delta$ 1, H $\delta$ 2, H $\epsilon$ 1, H $\epsilon$ 2, H $\zeta$ 1 7.28                    |
| Ala8              | 8.86      | 4.67                        | 1.30                       |                                                                                                 |
| Abu9              | 8.09      | 4.68                        | 2.74                       | H $\gamma$ 1 1.50                                                                               |
| Ile10             | n.d.      | 3.83                        | 1.93                       | H $\gamma$ 12 1.30, H $\gamma$ 13 1.02, H $\gamma$ 2 0.67, H $\delta$ 1 0.37                    |
| Abu11             | 9.06      | 4.13                        | 2.79                       | H $\gamma$ 1 1.08                                                                               |
| Asp12             | n.d.      | 4.67                        | 3.20, 2.68                 | H $\delta$ 1 4.97                                                                               |
| Asp13             | n.d.      | 2.89                        | 1.79, 1.50                 | H $\delta$ 1 5.18                                                                               |
| AlaS14            | 8.10      | 4.46                        | 3.02, 2.75                 |                                                                                                 |
| Pro15             | -         | 4.38                        | 2.02, 1.90                 | H $\gamma$ 2 1.96, H $\gamma$ 3 1.83, H $\delta$ 3.61                                           |
| Asn16             | 7.83      | 4.43                        | 2.88, 2.67                 | H $\delta$ 21 7.23, H $\delta$ 22 6.85                                                          |
| AlaS17            | n.d.      | 4.30                        | 3.56                       |                                                                                                 |
| Val18             | n.d.      | 4.18                        | 1.90                       | H $\gamma$ 0.80                                                                                 |
| Phe19             | 8.08      | 4.45                        | 3.02, 2.81                 | H $\delta$ 1, H $\delta$ 2, H $\epsilon$ 1, H $\epsilon$ 2, H $\zeta$ 1 7.23                    |
| Val20             | 7.84      | 4.21                        | 1.72                       | H $\gamma$ 1 0.81                                                                               |
| AlaS21            | 7.41      | 3.93                        | 3.12                       |                                                                                                 |
| AlaS22            | n.d.      | 4.74                        | 3.41                       |                                                                                                 |

n.d. Values were not detected or were not assignable due to peak overlap

**Suppl. Table 2.** Proton Chemical Shift Values for Salivaricin A2 (3-22).

| <b>Amino Acid</b> | <b>NH</b> | <b>H<math>\alpha</math></b> | <b>H<math>\beta</math></b> | <b>Side Chain</b>                                                                               |
|-------------------|-----------|-----------------------------|----------------------------|-------------------------------------------------------------------------------------------------|
| Gly3              | 7.93      | 3.65                        |                            |                                                                                                 |
| Thr4              | 8.39      | 4.29                        | 3.99                       | H $\gamma$ 1 5.00, H $\gamma$ 2 1.06                                                            |
| Gly5              | 8.05      | 3.79, 3.62                  |                            |                                                                                                 |
| Trp6              | 8.02      | 4.50                        | 2.81, 3.02                 | H $\delta$ 1 7.07, H $\epsilon$ 1 10.75, H $\epsilon$ 3 7.56, H $\zeta$ 2 7.32 H $\zeta$ 3 6.96 |
| Phe7              | 8.25      | 4.53                        | 3.02, 2.81                 | H $\delta$ 1, H $\delta$ 2, H $\epsilon$ 1, H $\epsilon$ 2, H $\zeta$ 1 7.23                    |
| Ala8              | 8.06      | 4.43                        | 1.24                       |                                                                                                 |
| Abu9              | 7.85      | 4.39                        | 3.64                       | H $\gamma$ 1 1.20                                                                               |
| Ile10             | n.d.      | 3.81                        | 1.93                       | H $\gamma$ 12 1.30, H $\gamma$ 13 1.02, H $\gamma$ 2 0.80, H $\delta$ 1 0.39                    |
| Abu11             | 9.0       | 4.09                        | 3.46                       | H $\gamma$ 1 1.13                                                                               |
| Asp12             | 7.28      | 4.59                        | 3.23, 2.70                 | H $\delta$ 1 4.97                                                                               |
| Asp13             | 7.62      | 2.77                        | 1.79, 1.50                 | H $\delta$ 1 5.18                                                                               |
| AlaS14            | 8.22      | 4.44                        | 3.04, 2.88                 |                                                                                                 |
| Pro15             | -         | 4.38 (4.17)                 | 2.01 (1.96)                | H $\gamma$ 1.89 (H $\gamma$ 1.83), H $\delta$ 3.59 (H $\delta$ 3.26)                            |
| Asn16             | 7.98      | 4.44                        | 2.88, 2.64                 | H $\delta$ 21 6.98, H $\delta$ 22 6.62                                                          |
| AlaS17            | 8.36      | 4.40                        | 3.61, 3.78                 |                                                                                                 |
| Val18             | 7.58      | 4.39                        | 2.35                       | H $\gamma$ 1 0.91, H $\gamma$ 2 1.01                                                            |
| Phe19             | 8.08      | 4.45                        | 3.02, 2.81                 | H $\delta$ 1, H $\delta$ 2, H $\epsilon$ 1, H $\epsilon$ 2, H $\zeta$ 1 7.23                    |
| Val20             | 7.87      | 4.23                        | 1.72                       | H $\gamma$ 1 0.81                                                                               |
| AlaS21            | 7.44      | 3.94                        | 3.09                       |                                                                                                 |
| AlaS22            | n.d.      | 4.75                        | 3.40                       |                                                                                                 |

n.d. Values were not detected or were not assignable due to peak overlap

**Suppl. Table 3.** Protease stability of salivaricin A2.

|              | pepsin stability (10 <sup>3</sup> CFU/mL) |             |         | trypsin stability (10 <sup>3</sup> CFU/mL) |             |         |
|--------------|-------------------------------------------|-------------|---------|--------------------------------------------|-------------|---------|
|              | treatment 1                               | treatment 2 | average | treatment 1                                | treatment 2 | average |
| untreated A2 | 30                                        | 26          | 28      | 31                                         | 37          | 34      |
| treated A2   | 28                                        | 33          | 30.5    | 3100                                       | 3600        | 3350    |
| control 1    | 2300                                      | 2600        | 2450    | 2900                                       | 3100        | 3000    |
| control 2    | 2100                                      | 2700        | 2400    | 2700                                       | 3300        | 3000    |
| control 3    | 2900                                      | 3300        | 3100    | 2900                                       | 3400        | 3150    |
| control 4    | 2600                                      | 2900        | 2750    | 3300                                       | 2800        | 3050    |

Activity of protease treated salivaricin A2 was determined by viable cell counts (CFU/ml). Salivaricin A2 was exposed to pepsin for 120 min and trypsin for 30 min. Control 1, control 2, control 3, and control 4 are the reaction buffer with protease and protease inhibitors, the reaction buffer with protease, the reaction buffer alone, and the THyex broth, respectively.

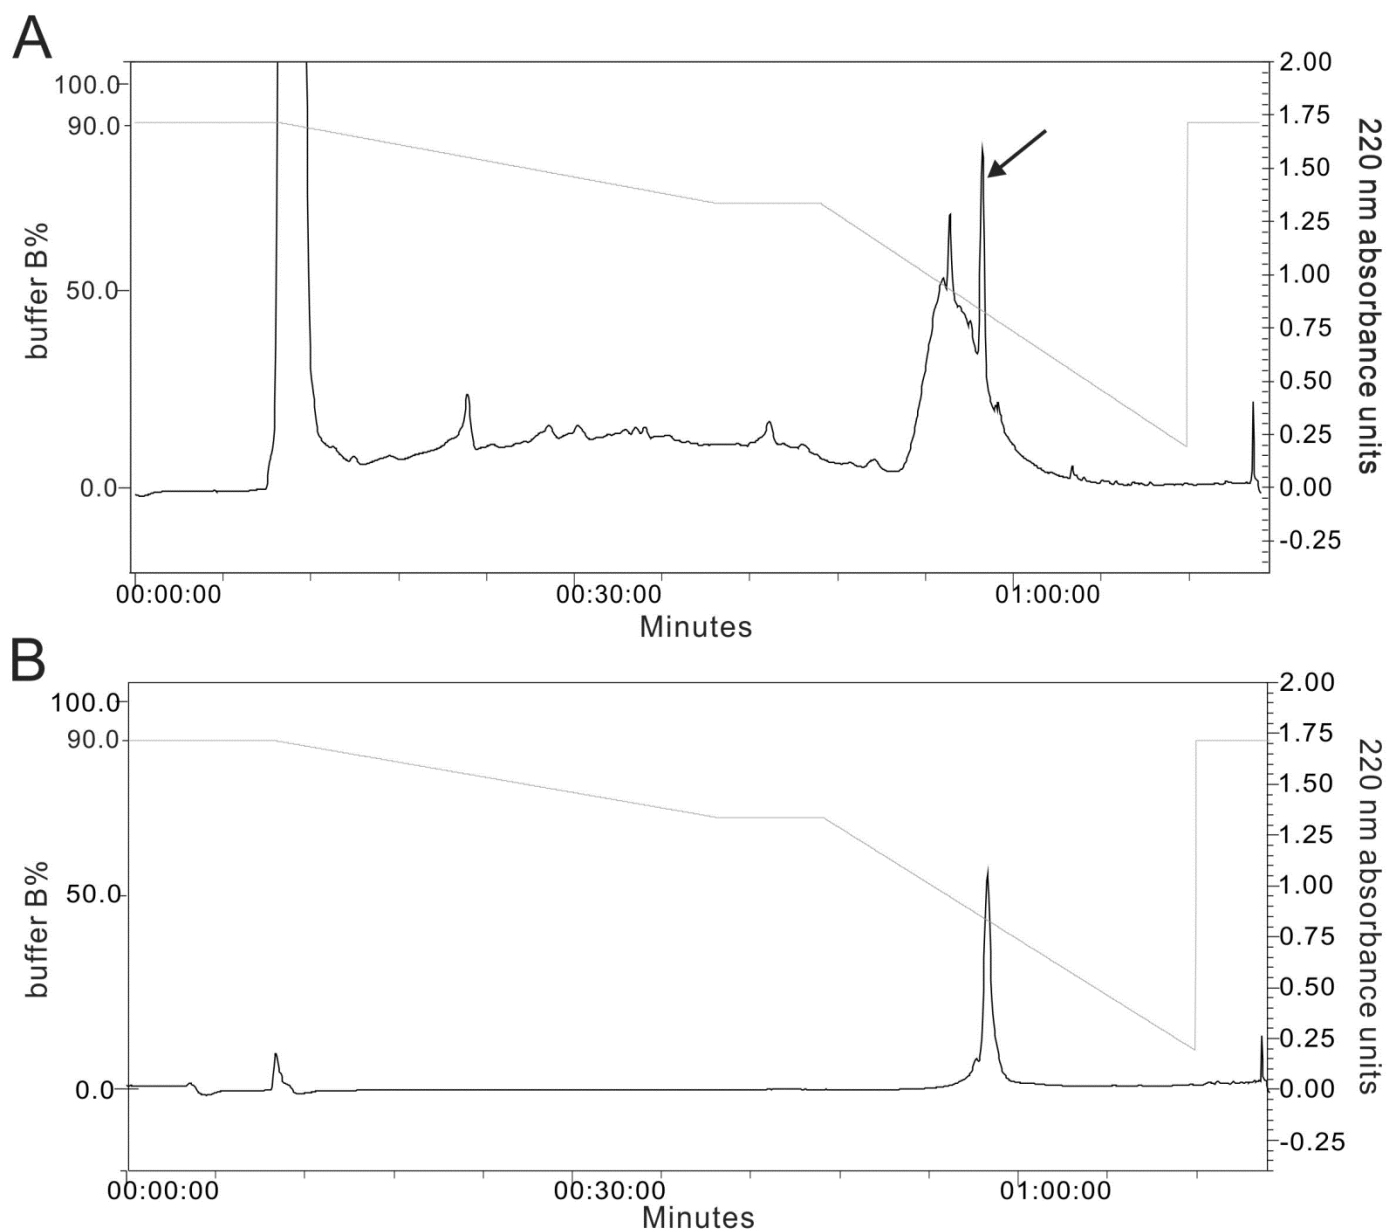

**Suppl. Figure 1** HPLC purification of salivaricin A2. *S. salivarius* HS0302 was inoculated into modified Thyex agar and incubated for 72 h at 37 °C before chloroform extraction. Extraction was applied on a semi-prep column (A) and the fraction indicated by arrow was collected, applied on the same column for further purification (B). Grey lines represent the gradient of buffer B (water with 0.1%TFA), while black lines represent the absorbance unit at 220 nm.

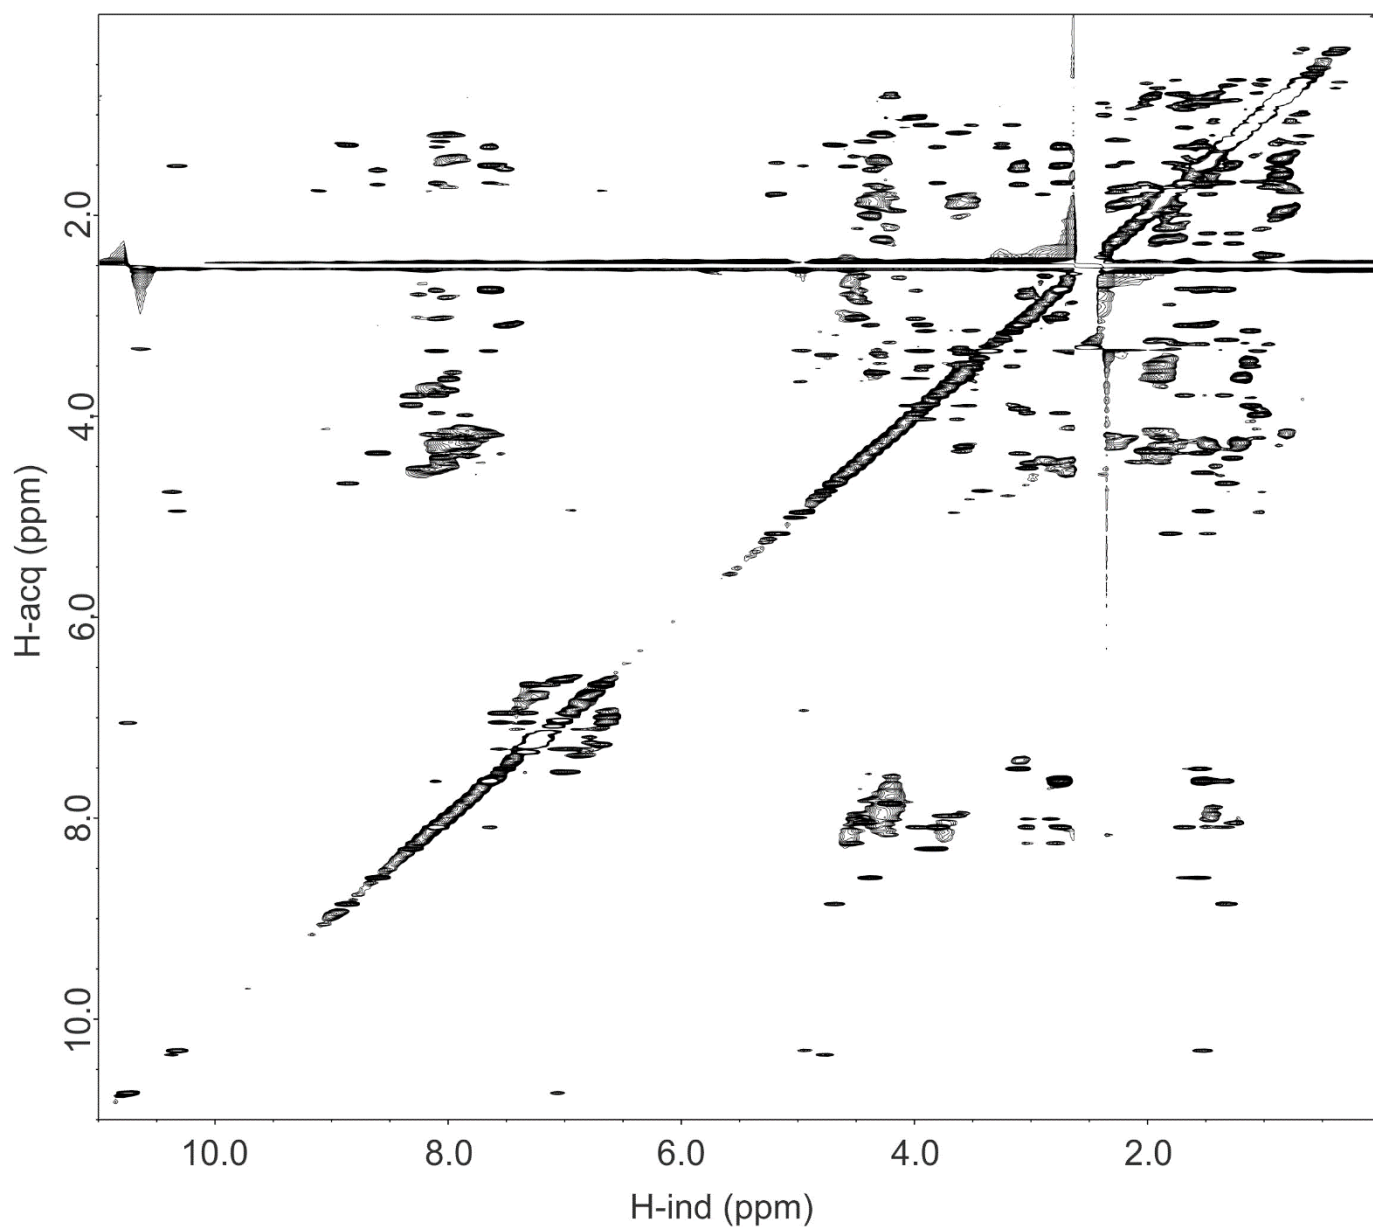

**Suppl. Figure 2.** TOCSY 60ms NMR Spectrum of salivaricin A2 in DMSO-d6 recorded at proton frequency of 850 MHz, using a TCI Cryoprobe.

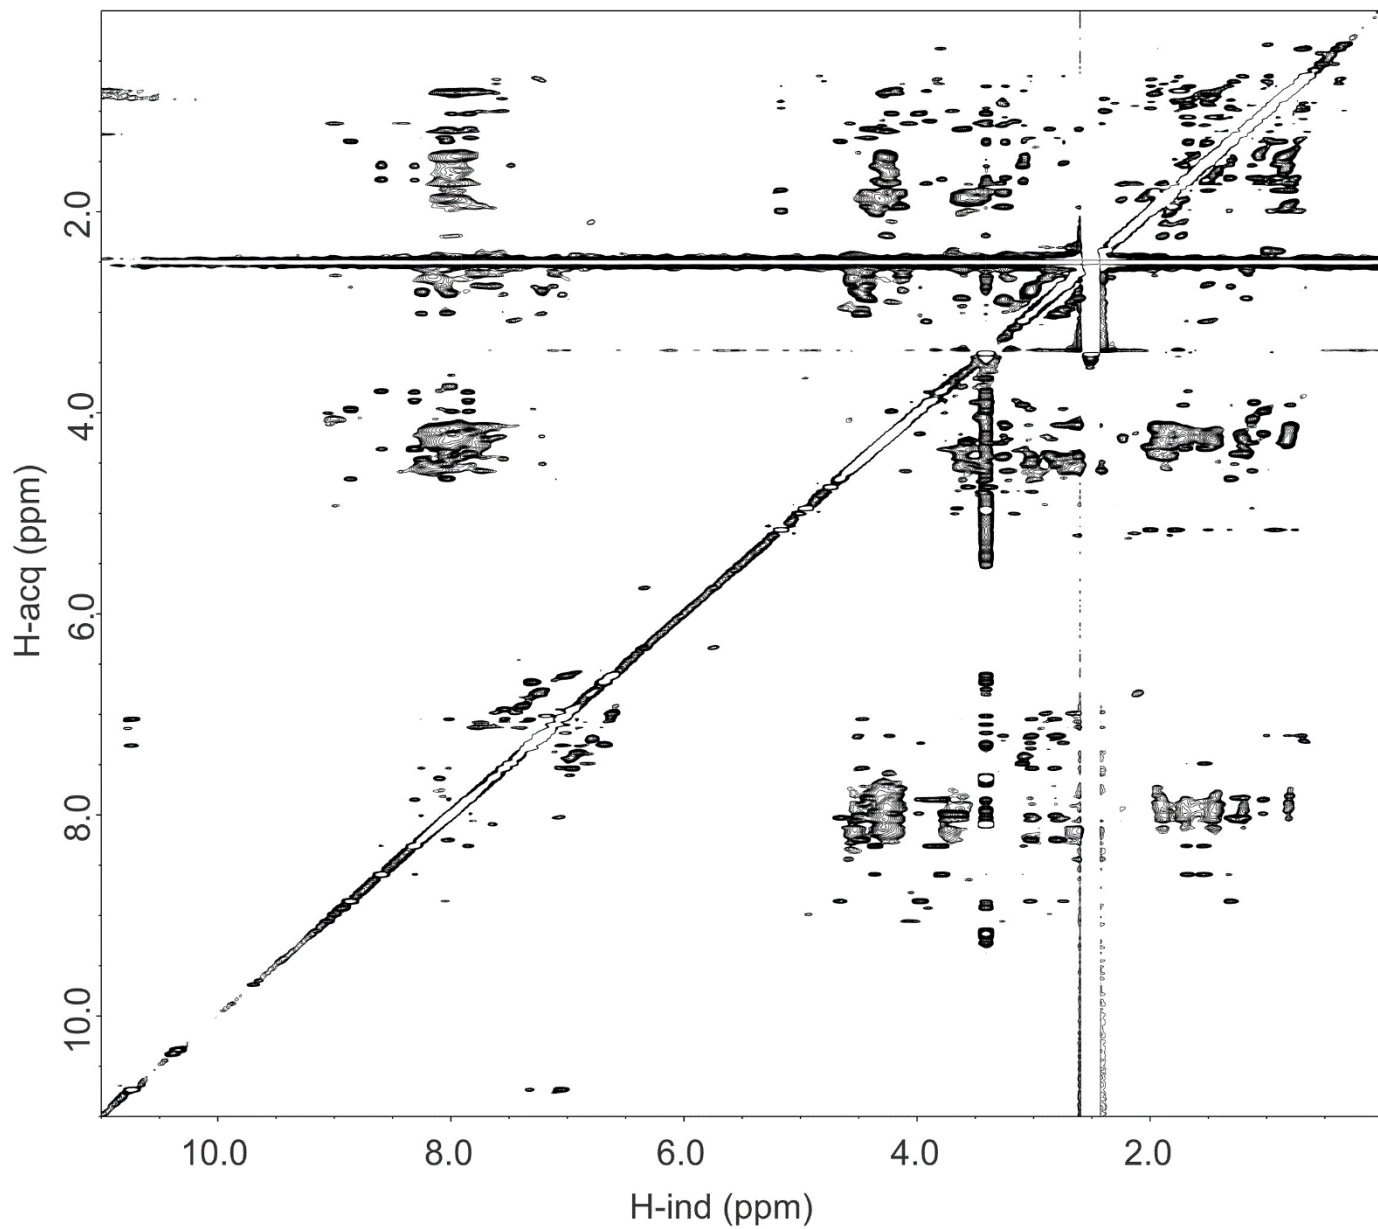

**Suppl. Figure 3.** NOESY 500ms NMR Spectrum of salivaricin A2 in DMSO-d6 recorded at proton frequency of 850 MHz, using a TCI Cryoprobe.

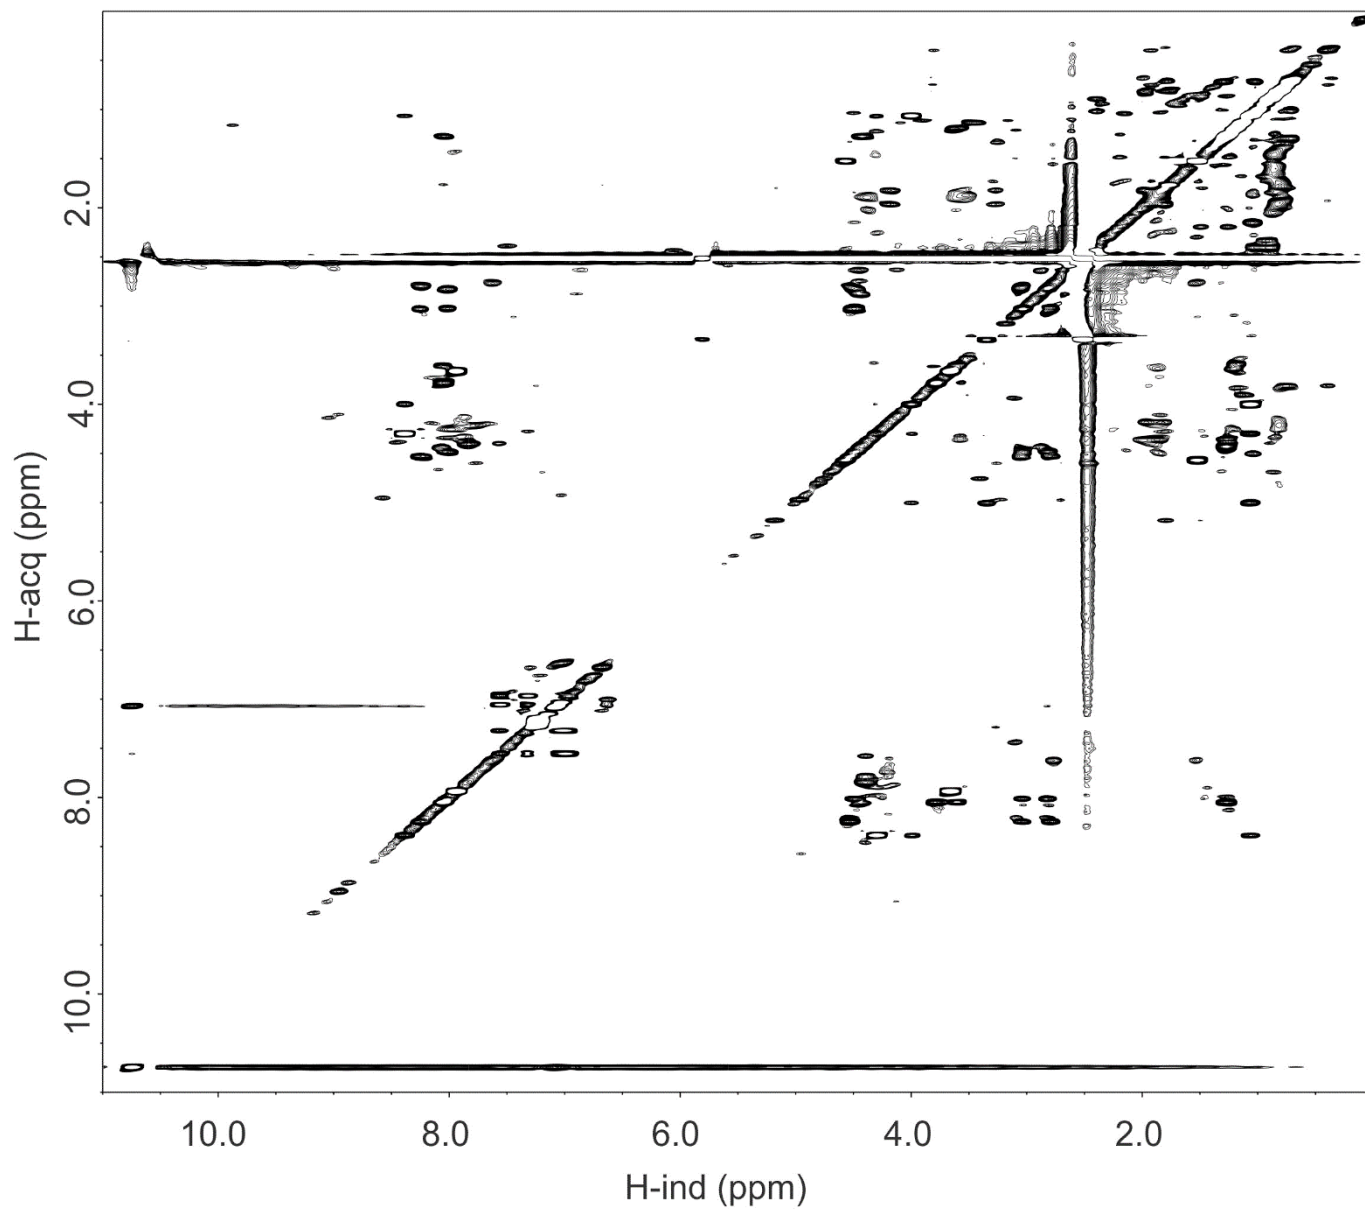

**Suppl. Figure 4.** TOCSY 60ms NMR Spectrum of salivaricin A2(3-22) in DMSO-d<sub>6</sub> recorded at proton frequency of 850 MHz, using a TCI Cryoprobe.



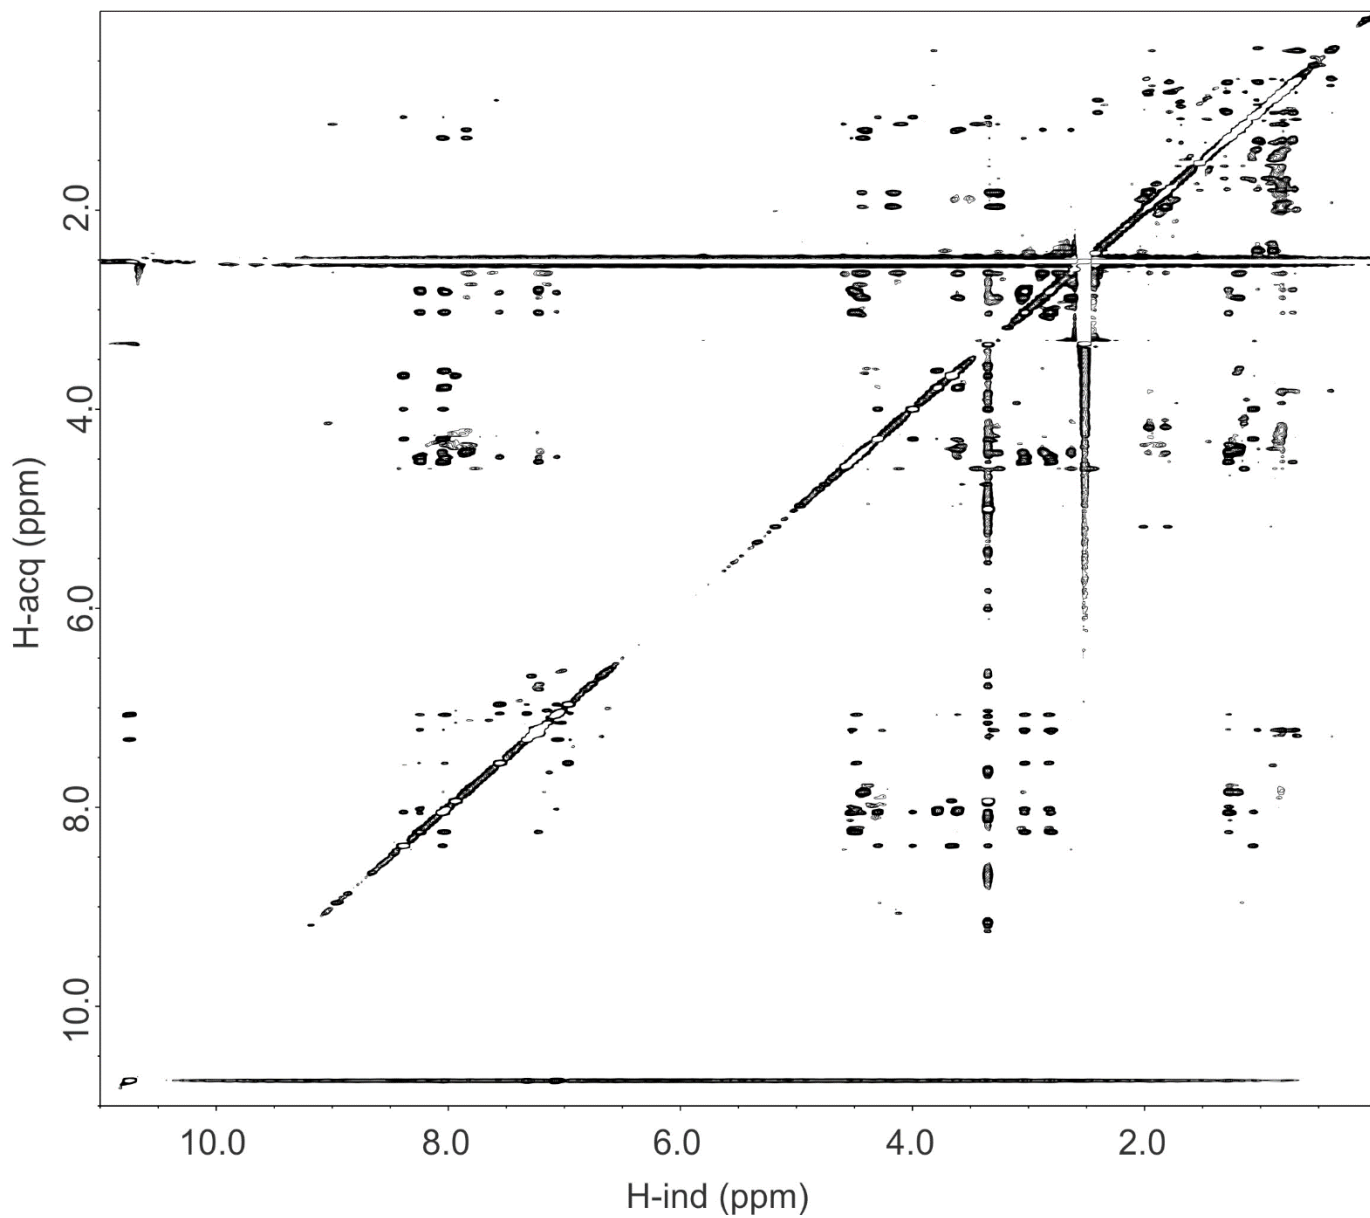

**Suppl. Figure 5.** NOESY 500ms NMR Spectrum of salivaricin A2(3-22) in DMSO-d<sub>6</sub> recorded at proton frequency of 850 MHz, using a TCI Cryoprobe.

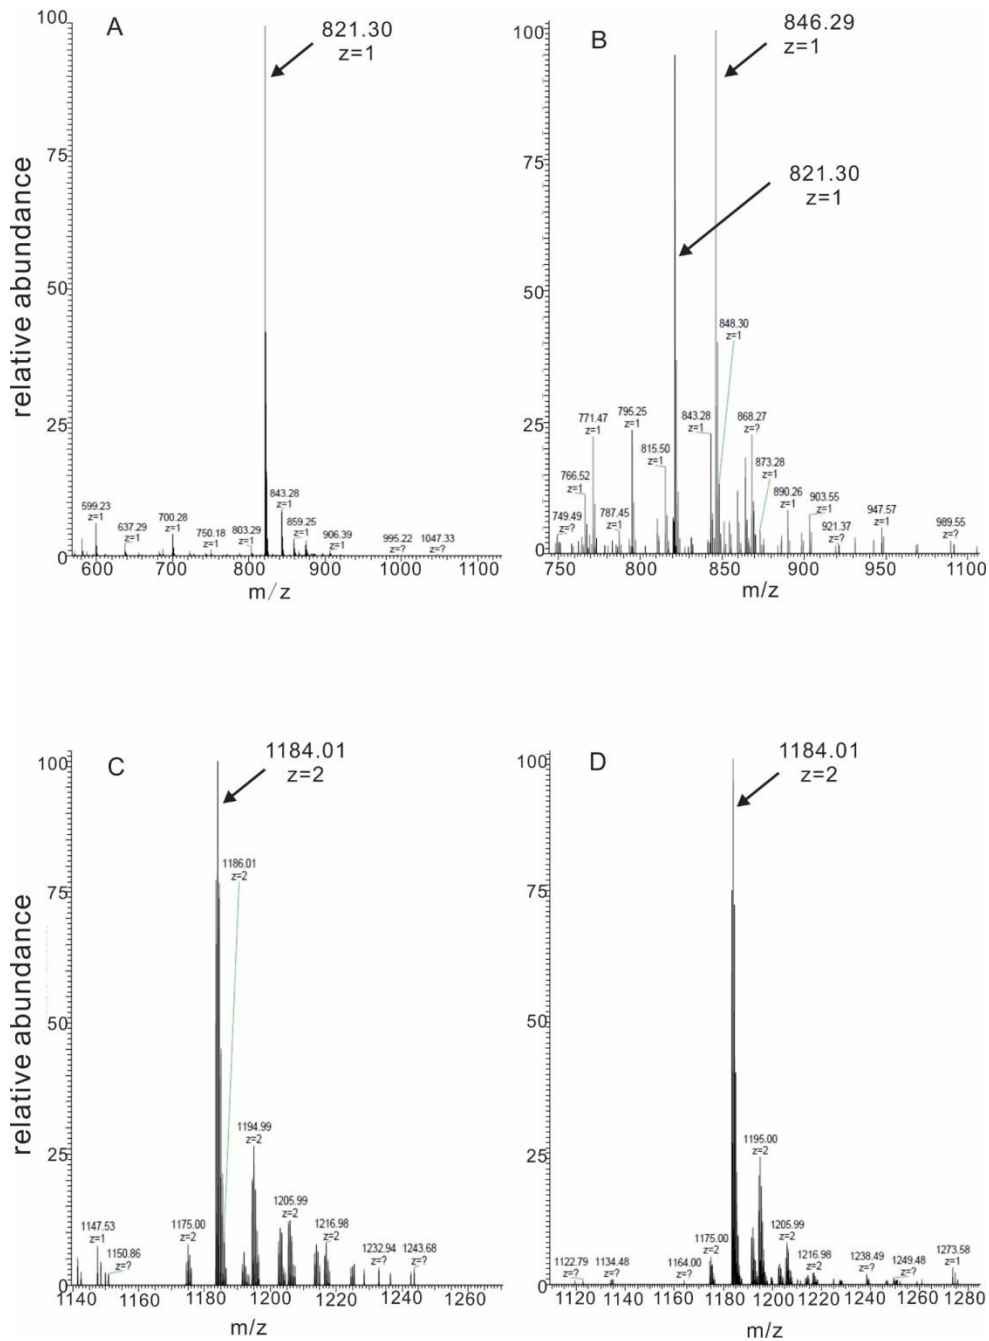

**Suppl. Figure 6.** Masses of salivaricin A2 and control peptide SFNSYTC before and after cyanylation by CDAP. (A) control peptide with one free cysteine; (B) control peptide after cyanylation; (C) salivaricin A2 before cyanylation; (D) salivaricin A2 after cyanylation.

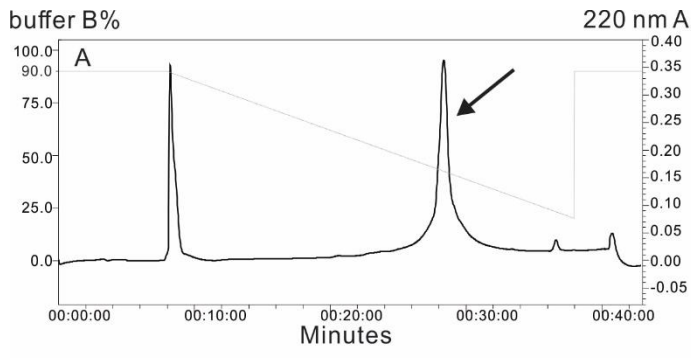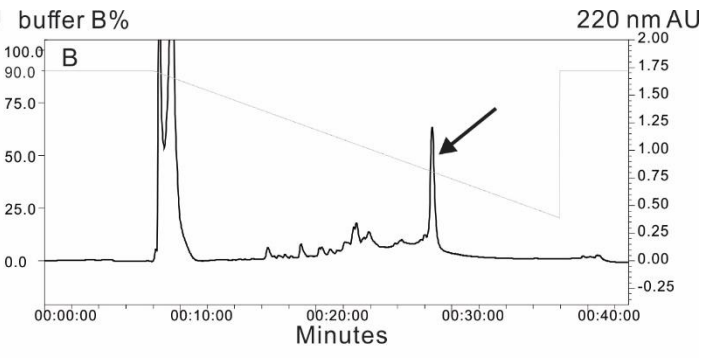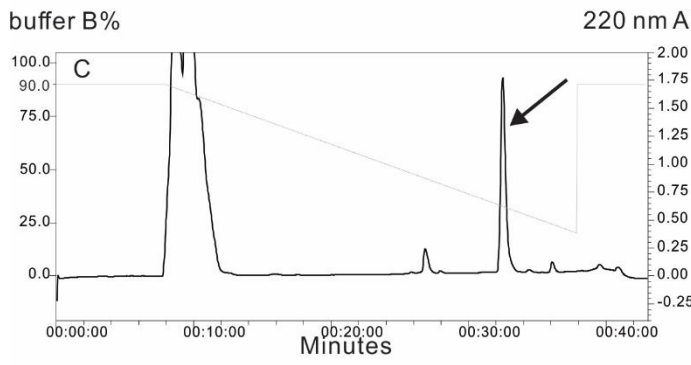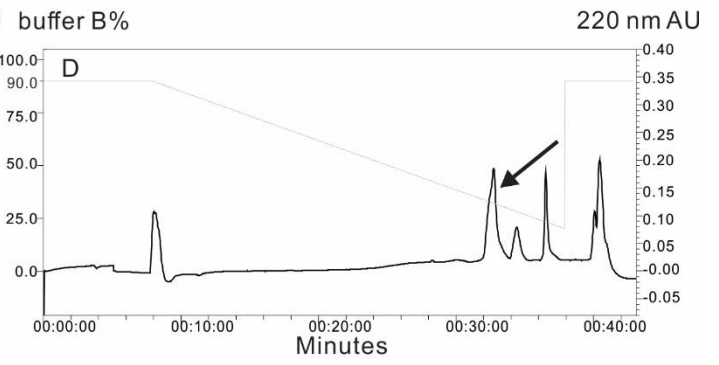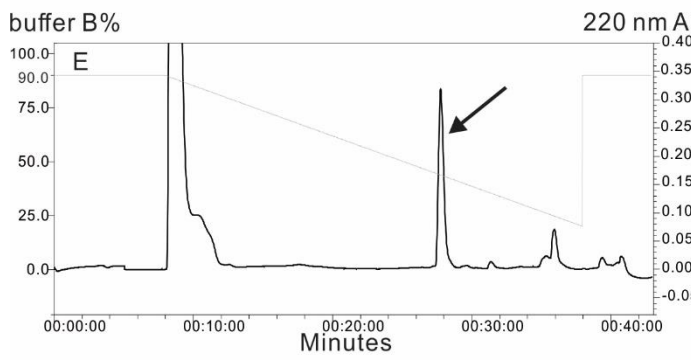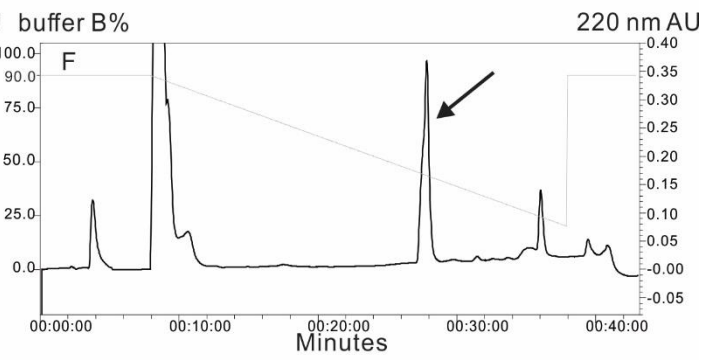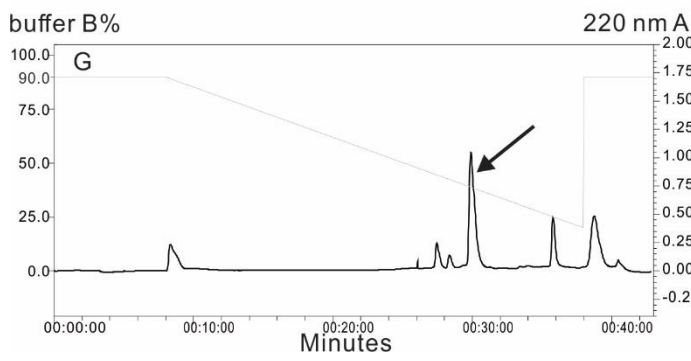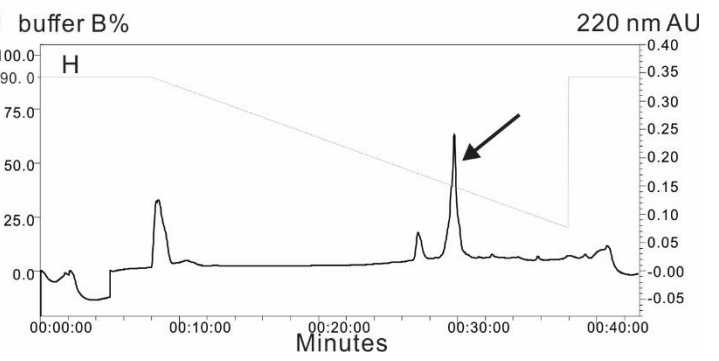

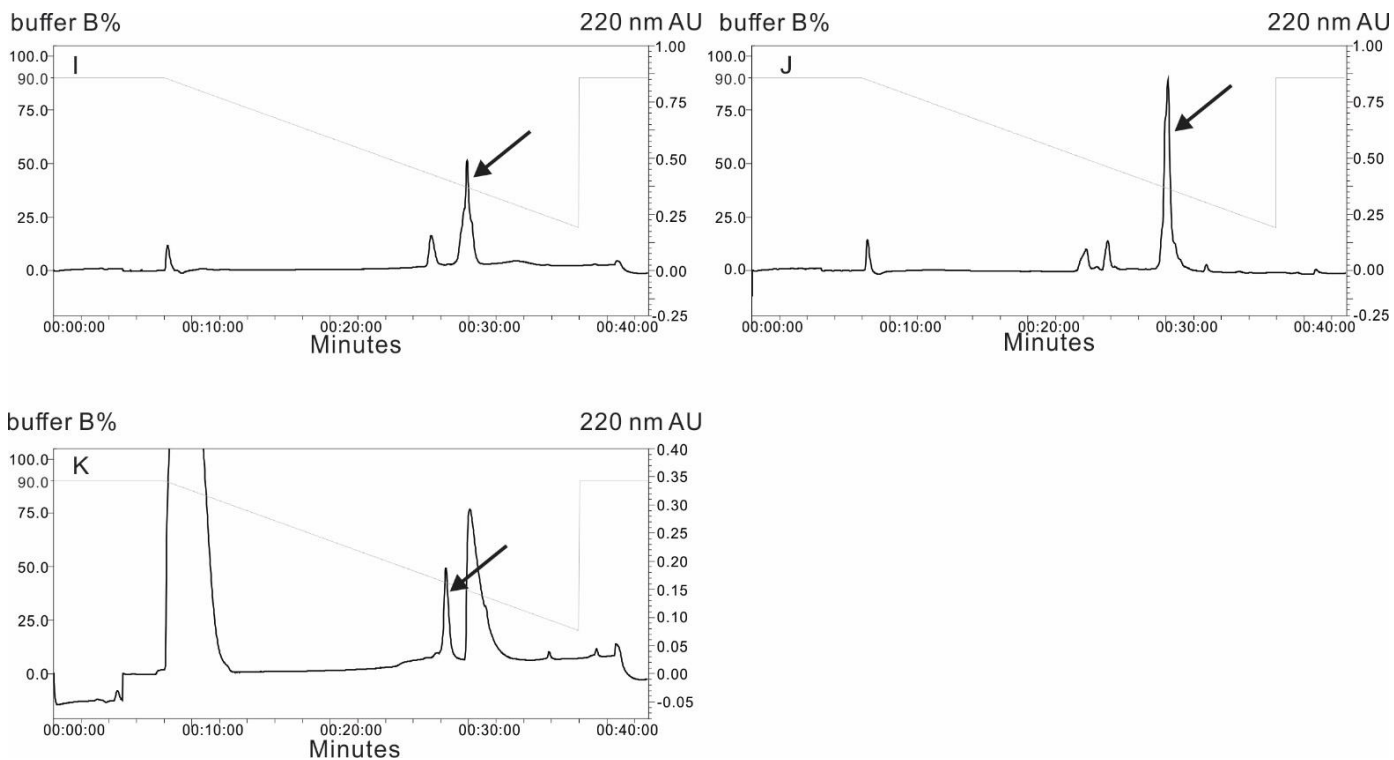

**Suppl. Figure 7.** HPLC chromatograms of reactions from HOAt/EDC couplings of salivarin A2(3-22) and amines. Grey lines represent the gradient of buffer B (water with 0.1%TFA), while black lines represent the absorbance unit (AU) at 220 nm. (A) 100  $\mu$ g salivarin A2; (B) trypsin digestion of salivarin A2; (C) salivarin A2(3-22) coupled with Fmoc-Lys; (D) salivarin A2(3-22) coupled with Fmoc-Arg; (E) salivarin A2(3-22) coupled with Lys; (F) salivarin A2(3-22) coupled with Arg; (G) salivarin A2(3-22) coupled with Fmoc-Ala-Ala; (H) salivarin A2(3-22) coupled with Ala-Ala; (I) salivarin A2(3-22) coupled with Ala; (J) salivarin A2(3-22) coupled with 5(6)-carboxyfluorescein; (K) salivarin A2(3-22) coupled with Lys-Arg.

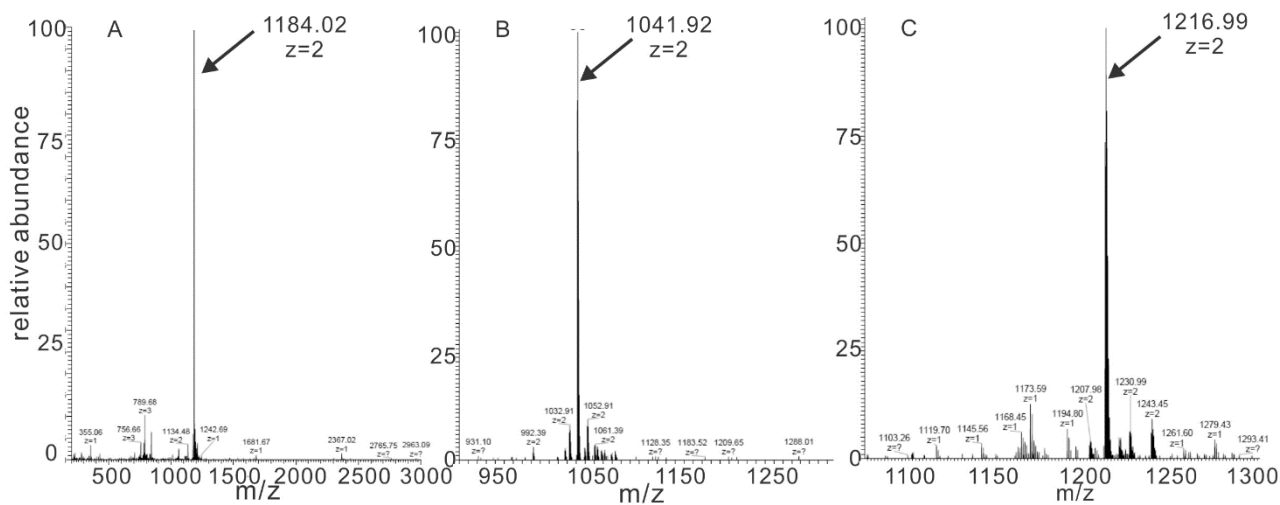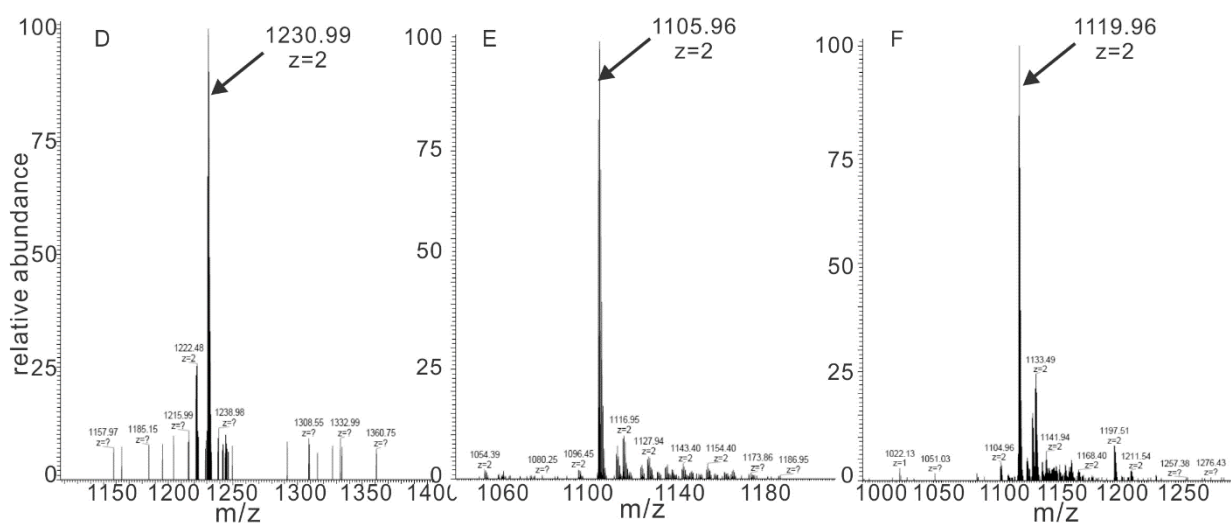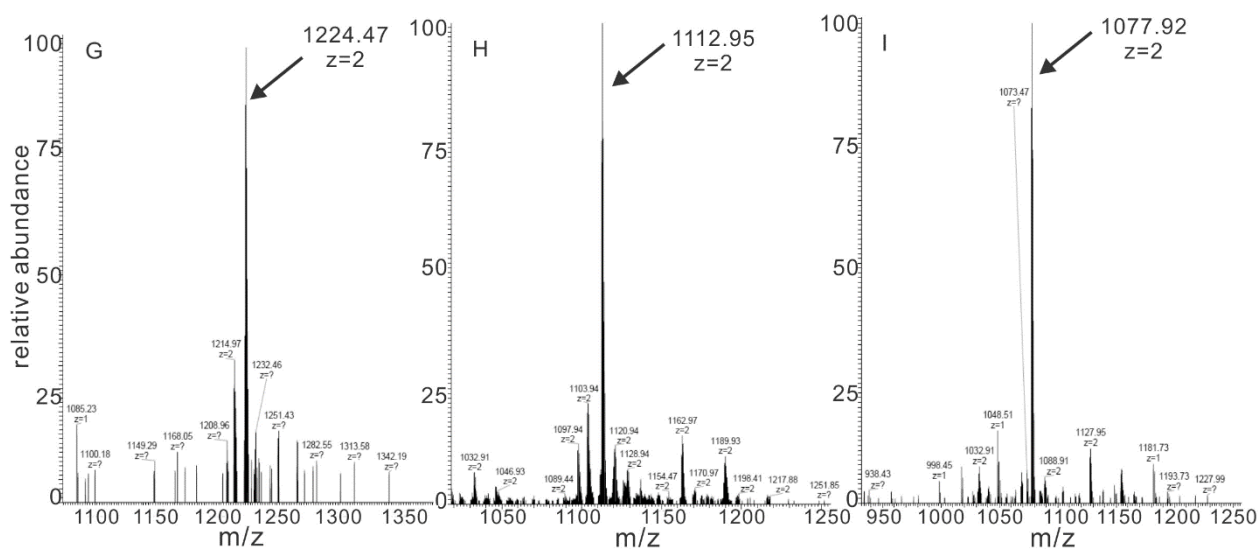

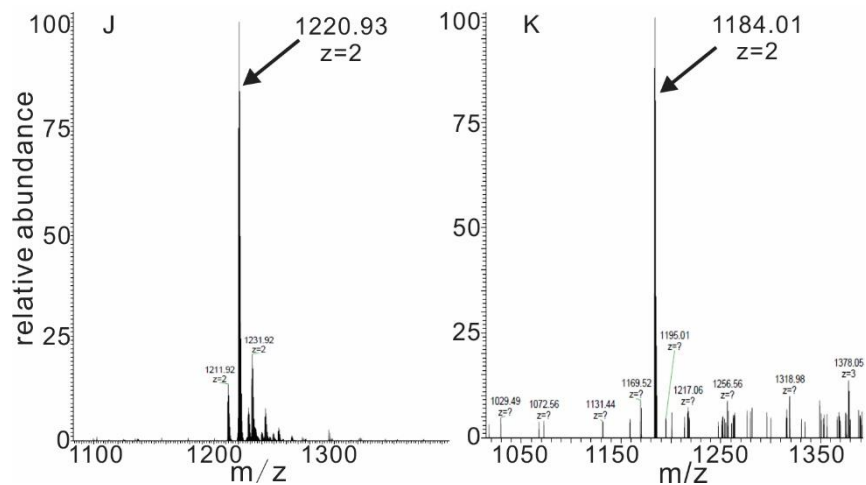

**Suppl. Figure 8.** ESI-MS data of novel analogues of salivaricin A2. (A) native salivaricin A2; (B) salivaricin A2(3-22); (C) salivaricin A2(3-22) coupled with Fmoc-Lys; (D) salivaricin A2(3-22) coupled with Fmoc-Arg; (E) salivaricin A2(3-22) coupled with Lys; (F) salivaricin A2(3-22) coupled with Arg; (G) salivaricin A2(3-22) coupled with Fmoc-Ala-Ala; (H) salivaricin A2(3-22) coupled with Ala-Ala; (I) salivaricin A2(3-22) coupled with Ala; (J) salivaricin A2(3-22) coupled with 5(6)-carboxyfluorescein; (K) salivaricin A2(3-22) coupled with Lys-Arg.

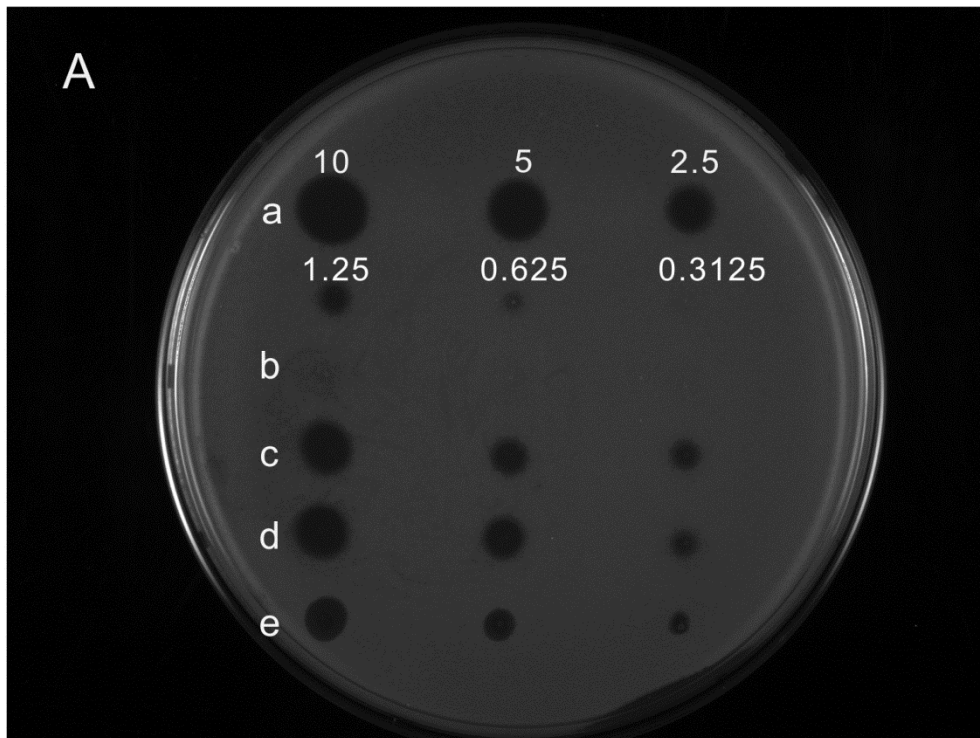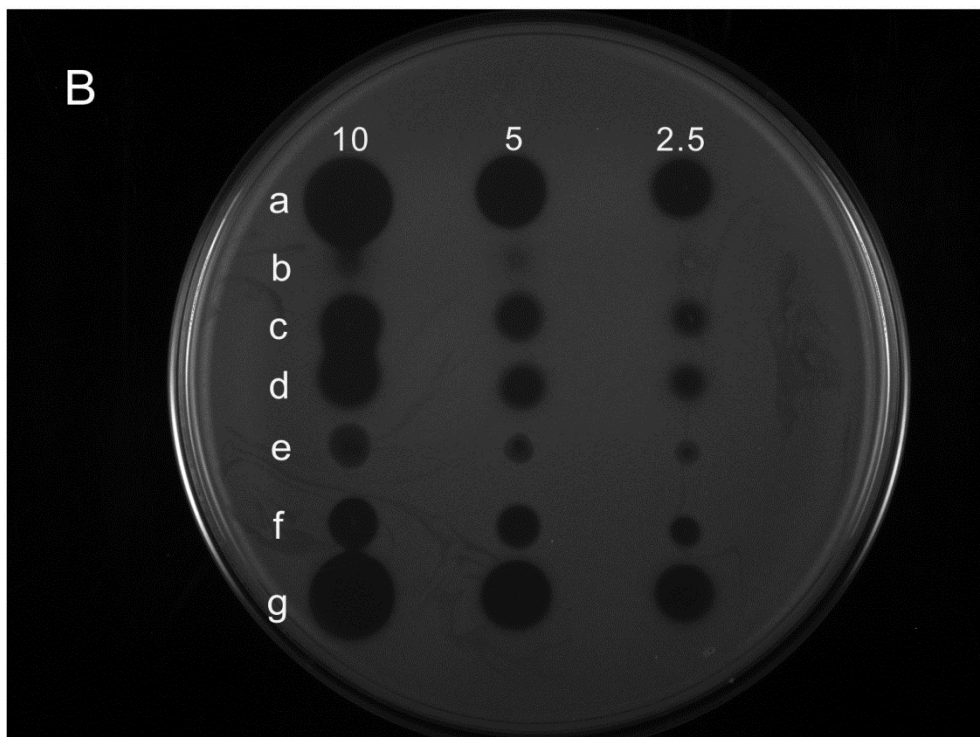

**Suppl. Figure 9.** Plates for overlays of novel analogues of salivaricin A2. The numbers on top of each spot specify the amount of material (in micrograms) spotted to give the zones of inhibitions. Plate A: A: native salivaricin A2, spotted at 10, 5, 2.5, 1.25, 0.625, and 0.3125  $\mu\text{g}$ ; B: salivaricin A2(3-22), spotted at 10, 5, and 2.5  $\mu\text{g}$ . There is no sign of any inhibitory activity. The other analogues were spotted at 10, 5, and 2.5  $\mu\text{g}$  of material. C: Fmoc-Lys+A2(3-22); D: Fmoc-Arg+A2(3-22); E: Fmoc-Ala-Ala+A2(3-22). 2: A: native salivaricin A2; B: salivaricin A2(3-22); C: Lys+A2(3-22); D: Arg+ A2(3-22); E: Ala+ A2(3-22); F: Ala-Ala+ A2(3-22); G: Lys-Arg+ A2(3-22).

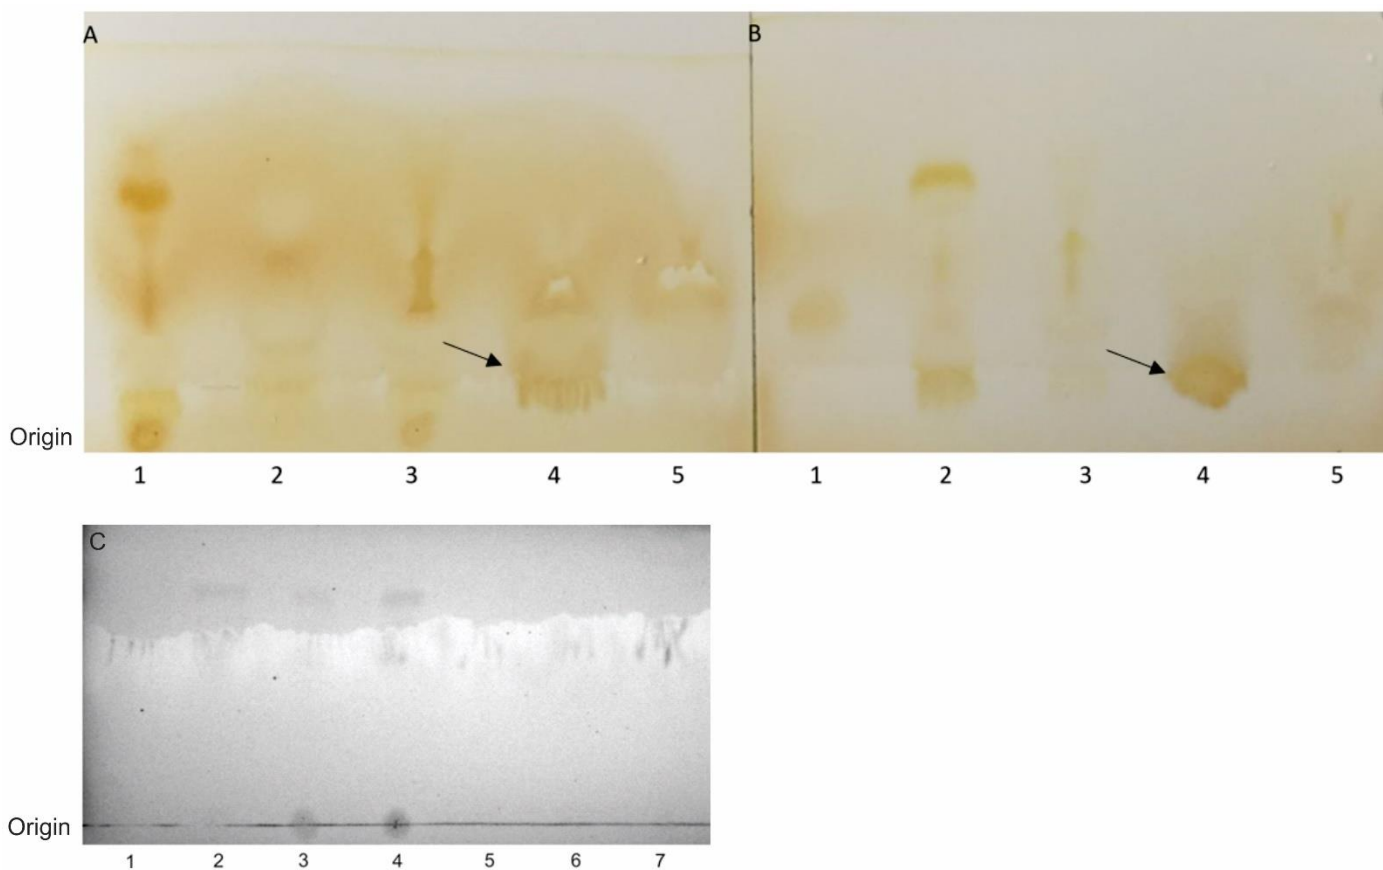

**Suppl. Figure 10.** TLC plates. A: Lane 1: mutacin 1140 and lipid II, 12:1 ratio; Lane 2: salivaricin A2 and lipid II, 12:1 ratio; Lane 3: salivaricin A2 and lipid II, 24:1 ratio; Lane 4: vancomycin and lipid II, 12:1 ratio; lane 5: digested salivaricin A2 and lipid II, 24:1 ratio. B: Lane 1: lipid II; Lane 2: mutacin 1140; Lane 3: salivaricin A2; Lane 4: vancomycin; Lane 5: digested salivaricin A2. Mutacin 1140 is known for retaining lipid II at the origin and is served as a positive control. Vancomycin targets the terminal D-Ala-D-Ala moiety of lipid II. The antibiotic migrates on the TLC plate (as demarcated by the arrow), thus it is not able to retain lipid II at the origin. The antibiotic served as a negative control. C: Lane 1: lipid II; Lane 2: Mu1140; Lane 3 and 4: Mu1140 to lipid II 3:1 and 12:1 ratio, respectively; Lane 5: salivaricin A2; Lane 6 and 7: salivaricin A2 to lipid II, 3:1 and 12:1 ratio, respectively.



```

-ttaatgaga gtttgatcct ggctcaggac gaacgctggc ggcgtgccta atacatgcaa gtagaacgct
gaagagagga gcttgctctt cttggatgag ttgcgaacgg gtgagtaacg cgtaggtaac ctgccttgta
gcgggggata actattggaa acgatagcta ataccgcata acaatggatg acacatgtca tttatttgaa
aggggcaatt gctccactac aagatggacc tgcgttgtat tagctagtag gtgaggtaac ggctcaccta
ggcgacgata catagccgac ctgagagggg gatcggccac actgggactg agacacggcc cagactccta
cgggaggcag cagtagggaa tcttcggcaa tgggggcaac cctgaccgag caacgccgag tgagtgaaga
aggttttcgg atcgtaaagc tctgttgtaa gtcaagaacg agtgtgagag tggaaaattc aactgtgac
ggtagcttac cagaaagggg cggctaacta cgtgccagca gccgcggtaa tacgtaggtc ccgagcgttg
tccggattta ttgggcgtaa agcagcgcga ggcggtttga taagtctgaa gttaaaggct gtggctcaac
catagtctgc tttggaaact gtcaaacttg agtgcagaag gggagagtgg aattccatgt gtagcgggta
aatgcgtaga tatatggagg aacaccggtg gcgaaagcgg ctctctggtc tgtaactgac gctgaggctc
gaaagcgtgg ggagcgaaca ggattagata ccctggtagt ccacgccgta aacgatgagt gctaggtggt
ggatcctttc cgggattcag tgccgcagct aacgcattaa gcaactccgc tggggagtac gaccgcaagg
ttgaaactca aaggaattga cgggggcccg cacaagcggg ggagcatgtg gtttaattcg aagcaacgcg
aagaacctta ccaggtcttg acatcccgat gctatttcta gagatagaaa gttacttcgg tacatcggtg
acaggtggg catggttgtc gtcagctcgt gtcgtgagat gttgggttaa gtcccgaac gagcgaacc
cctattgtta gttgccatca ttcagttggg cactctagcg agactgccgg taataaaccg gaggaagggtg
gggatgacgt caaatcatca tgccccttat gacctgggct acacacgtgc tacaatgggt ggtacaacga
gttgcgagtc ggtgacggca agctaacttc ttaaagccaa tctcagttcg gattgtaggc tgcaactcgc
ctacatgaag tcggaatcgc tagtaatcgc ggatcagcac gccgcgggta atacgttccc gggccttgta
cacaccgcc gtcacaccac gagagtttgt aacaccgaa gtcggtgagg taaccttttg gagccagccg
cctaagggtg gatagatgat tggggtgaag tcgtaacaag gtagccgtat cggaagggtc ggctggatca
cctcctttct aaggaa-

```

**Suppl. Figure 11.** Representative 16S rRNA sequence of *S. salivarius* HS0302. Based on the genome sequence of the bacterium, it has at least four copies of 16S rRNA, all of which possess higher than 99% identity with *S. salivarius* ATCC 27945, thus we name it as *S. salivarius* HS0302. The only different nucleotide (A-G) in the 16S rRNA sequence shown above is highlighted in red.
